# Supplementary material for: Academic Motivation, Perceived Employability, Academic Outcomes, and Well-Being in Greek Higher Education
Source: Research Square preprint supplement (doi:10.21203/rs.3.rs-6813096/v1), 2025-06-30
Supplement: Supplementary file 1 [file ef9f07f5768f9f7532f0eb89.pdf]

**PGR AOC Research Ethics Committee**

*Athens, September 10, 2024*

**To Whom It May Concern,**

The **Research Ethics Committee of the Postgraduate Research Programme at Aegean Omiros College (PGR AOC)** has reviewed and approved the research proposal entitled: **Academic Motivation, Perceived Employability, Academic Outcomes, and Well-Being in Greek Higher Education**, submitted by Laura Maska.

The research aims to examine how basic psychological need satisfaction, academic motivation, and perceived employability interrelate and influence students' academic performance and well-being. The study involves the collection of data from students in Higher Education in Greece, through anonymous and voluntary online questionnaires in accordance with ethical standards for research involving human participants.

Following thorough review, the Committee confirms that the proposed research meets the ethical standards required for studies involving human participants.

The study design ensures voluntary participation, anonymity, informed consent for participation, informed consent for publication, and safeguards the rights and well-being of participants throughout the study and the process.

Accordingly, ethical approval is granted today, on **September 10, 2024** prior to the commencement of data collection, under the approval code: **PGR-AOC-2024-09PS24**.

Sincerely

Dr Grigoris Risvas  
Academic Director & Chair of Research Ethics Committee
